# Supplementary material
Source: MDPI journal article supplement (https://www.mdpi.com/2072-4292/16/7/1166)
Supplement: s1 [file s1]

# Supplementary Materials

## Section 3.1. (Results). Thresholding for fire activity stratification

The sampling units with a lower BA percentage than the biome-specific threshold were stratified as low fire activity, while those with a higher BA percentage composed the high fire activity stratum.

**Table S1.** Threshold values determined to each biome for the high/low fire activity stratification. The value was defined in the 80<sup>th</sup> percentile.

| Biome                      | Threshold (% BA) |
|----------------------------|------------------|
| Tropical Forest            | 5.5752           |
| Tropical Savanna           | 17.3876          |
| Temperate Savanna          | 1.4950           |
| Deserts & Xeric Shrublands | 2.7102           |
| Temperate Forest           | 0.8430           |
| Mediterranean              | 3.0206           |

## Section 3.2. (Results). Total area for each category of S2RP by biomes

**Table S2.** Total burned, unburned and unobserved area, and corresponding percentage (%) for each biome.

| Biome                      | Categories ( $km^2$ (%)) |                   |                   |
|----------------------------|--------------------------|-------------------|-------------------|
|                            | <i>Burned</i>            | <i>Unburned</i>   | <i>Unobserved</i> |
| Tropical Forest            | 4,637.4 (1.9%)           | 204,599.5 (84.5%) | 32,940.6 (13.6%)  |
| Tropical Savanna           | 13,512.9 (8.3%)          | 142,493.3 (87.7%) | 6,522.6 (4.0%)    |
| Temperate Savanna          | 248 (0.6%)               | 39,961.7 (97.5%)  | 764.6 (1.9%)      |
| Deserts & Xeric Shrublands | 419.3 (1.0%)             | 39,481.7 (98.6%)  | 146.9 (0.4%)      |
| Temperate Forest           | 542.7 (1.3%)             | 39,675.8 (94.5%)  | 1,743.2 (4.1%)    |
| Mediterranean              | 400.4 (1.0%)             | 38,962.9 (93.8%)  | 2,160.7 (5.2%)    |
| Total                      | 19,760.7 (3.5%)          | 505,174.9 (88.7%) | 44,278.6 (7.8%)   |

### Section 3.3. (Results). S2RP-PlanetScope comparison sites

**Table S3.** The characteristics of the selected S2RP - PlanetScope comparison sites: n° and country of the site; the coordinates of the site centroid and its total area; the biome, burned and unobserved percentage, and the period of the overlapping sample unit and its tile; and the PlanetScope period, number of PlanetScope scenes employed and the composites downloaded.

| Site<br>&<br>Country | Coordinates             | Area<br>(km <sup>2</sup> ) | Biome                            | S2RP<br>Burned<br>(%) | S2RP<br>Unobserved<br>(%) | S2RP tile<br>&<br>Dates        | PlanetScope Time Period                     | N<br>PlanetScope<br>Scenes | N<br>PlanetScope<br>Composites |
|----------------------|-------------------------|----------------------------|----------------------------------|-----------------------|---------------------------|--------------------------------|---------------------------------------------|----------------------------|--------------------------------|
| 1<br>Brazil          | 9.3952 S<br>50.1781 W   | 587.9                      | Tropical<br>Forest               | 46.59%                | 0.06%                     | 22LEQ<br>15/06/2019→23/09/2019 | 15/06/2019→22/09/2019-03/10/2019            | 63                         | 7                              |
| 2<br>Bolivia         | 14.2353 S<br>63.7950 W  | 456.5                      | Tropical<br>Forest               | 21.36%                | 2.81%                     | 20LMK<br>16/05/2019→28/09/2019 | 16/05/2019-17/05/2019→28/09/2019-30/09/2019 | 57                         | 7                              |
| 3<br>Paraguay        | 26.1125 S<br>56.5581 W  | 536.3                      | Tropical<br>Forest               | 17.97%                | 0.03%                     | 21JWM<br>23/06/2019→21/09/2019 | 23/06/2019→21/09/2019-22/09/2019-23/09/2019 | 45                         | 5                              |
| 4<br>Brazil          | 13.1352 S<br>51.2781 W  | 580.6                      | Tropical<br>Savanna              | 82.74%                | 0.11%                     | 22LDL<br>15/07/2019→23/09/2019 | 16/07/2019→24/09/2019-25/09/2019            | 46                         | 5                              |
| 5<br>Venezuela       | 8.2048 N<br>66.6781 W   | 589.8                      | Tropical<br>Savanna              | 38.78%                | 4.02%                     | 19PGK<br>05/01/2019→15/04/2019 | 05/01/2019-06/01/2019→15/04/2019            | 58                         | 6                              |
| 6<br>Venezuela       | 7.7648 N<br>68.8620 W   | 503.8                      | Tropical<br>Savanna              | 20.63%                | 0.22%                     | 19NEJ<br>18/01/2019→03/04/2019 | 18/01/2019-19/01/2019→03/04/2019            | 61                         | 5                              |
| 7<br>Argentina       | 39.5352 S<br>64.6981 W  | 461.9                      | Temperate<br>Savanna             | 14.19%                | 0.21%                     | 20HLB<br>09/02/2019→20/04/2019 | 09/02/2019→20/04/2019-21/04/2019            | 44                         | 5                              |
| 8<br>Mexico          | 32.1848 N<br>115.0781 W | 506.1                      | Deserts &<br>Xeric<br>Shrublands | 11.10%                | 0.00%                     | 11SPR<br>04/08/2019→28/10/2019 | 04/08/2019-08/08/2019→28/10/2019-29/10/2019 | 46                         | 5                              |
| 9<br>Chile           | 38.4352 S<br>72.1781 W  | 478.8                      | Temperate<br>Forest              | 19.45%                | 0.01%                     | 19HBT<br>19/01/2019→30/03/2019 | 18/01/2019→30/03/2019-02/04/2019            | 46                         | 5                              |
| 10<br>Chile          | 36.8952 S<br>71.9581 W  | 469.1                      | Mediterranean                    | 17.98%                | 0.00%                     | 19HBV<br>19/01/2019→14/04/2019 | 19/01/2019-23/01/2019→15/04/2019-27/04/2019 | 42                         | 4                              |
| <b>Total</b>         |                         | <b>5170.9</b>              |                                  | <b>30.56%</b>         | <b>0.77%</b>              |                                |                                             | <b>508</b>                 | <b>54</b>                      |
